# Supplementary material for: Susceptibility to cellular stress in PS1 mutant N2a cells is associated with mitochondrial defects and altered calcium homeostasis
Source: Sci Rep. 2020 Apr 15;10:6455. doi: 10.1038/s41598-020-63254-7 (PMC7160112; doi:10.1038/s41598-020-63254-7)
Supplement: Supplementary file 1 — Supplementary Methods and Results. [file 41598_2020_63254_MOESM1_ESM.pdf]

# **Susceptibility to cellular stress in PS1 mutant N2a cells is associated with mitochondrial defects and altered calcium homeostasis**

Liliana Rojas-Charry\*<sup>1</sup>, Sergio Calero-Martinez\*<sup>1</sup>, Claudia Morganti<sup>2</sup>, Giampaolo Morciano<sup>2</sup>, Kyungeun Park<sup>1</sup>, Christian Hagel<sup>1</sup>, Stefan J. Marciniak<sup>3</sup>, Markus Glatzel<sup>1</sup>, Paolo Pinton<sup>2</sup> and Diego Sepulveda-Falla<sup>1#</sup>

1. Institute of Neuropathology, University Medical Center Hamburg-Eppendorf, Hamburg, Germany. 2. Department of Morphology, Surgery and Experimental Medicine, Section of Pathology, Oncology and Experimental Biology, University of Ferrara, 44121, Ferrara, Italy. 3. Cambridge Institute for Medical Research (CIMR), University of Cambridge, Cambridge, UK. \* These authors contributed equally. # Correspondence to be addressed to: Dr. Diego Sepulveda-Falla, 05.002, Institute of Neuropathology, N27, University Medical Center Hamburg-Eppendorf, Martinistrasse 52, 20246. Hamburg, Germany. E-mail: dsepulve@uke.de

## **Supplemental Material and Methods**

### **Quantitative PCR (qPCR)**

Total RNA was isolated from cells with RNeasy Mini Kit (Qiagen, Hilden, Germany) according to the manufacturer's instructions (Invitrogen, Carlsbad, CA, USA). The isolated RNA was then treated with DNase I (Invitrogen, Carlsbad, CA, USA). 500 ng of total RNA was reverse transcribed with RevertAid H Minus First Strand cDNA Synthesis kit (Thermo Fisher Scientific, Schwerte, Germany) using OligodT's. cDNA templates were diluted ten-fold before performing qPCR. The primers used for PS1 were 5'-CTGGTGAAGACCCAGAGGAA-3' (forward) and 5'-AAACAAGCCCAAAGGTGATG-3' (reverse) while the primers for  $\beta$ -actin were 5'-GCTTCGCTGTCTACTTTCCA-3' (forward) and 5'-CAGCCCGACTACTGCTTAGA-3' (reverse) (Greenough et al., 2011). Quantitative PCR was performed on a RotorGeneQ (Qiagen, Hilden, Germany) with Maxima SYBR Green/Fluorescein qPCR Master Mix (Thermo Fisher Scientific, Schwerte, Germany). Results were analyzed using the Delta-Delta-Ct method (Kubista et al., 2006; Livak and Schmittgen, 2001).

### **Confocal Immunofluorescence**

For confocal microscopy cells were cultured and fixed with pre-warmed 4% paraformaldehyde for 10 min, then washed three times with Phosphate buffered saline (PBS) 1X for 5 min and permeabilized with Triton X-100 0.25% in PBS 1X for 10 min. Blocking buffer (1% BSA and Triton X-100 0.25% in PBS 1X) was added for 1 h. Then the cells were incubated overnight with antibodies against PS1, KDEL, Tom20, GM130, LC3B and LAMP1. The primary antibody was washed with PBS 1X 3 times for 5 min. The secondary fluorescent antibody (Alexa Fluor 555 goat anti-rabbit IgG, 1:500, A-11079 Invitrogen, Carlsbad, CA, USA and Alexa Fluor 488) was added for 2 h. Then the cells were washed again and one drop of Fluoromount-G<sup>TM</sup> was applied to each slide. Images were acquired on a LCS-SP5 (Leica

Microsystems, Wetzlar, Germany) confocal microscope, with a HCX PL APO Lambda blue 63x/1.4 Oil UV objective under illumination with a HeNe laser at 488 nm. Pictures were obtained by using z-stacks of 20 images separated by 1  $\mu$ m along the z axis. Colocalization was analyzed using Image J software 1.51d (National Institutes of Health, Baltimore, MD, USA). For LC3B and LAMP1 colocalization, serum starved (16 h) and non-starved PS1E280A N2a cells were cultured, fixed and analyzed as described above.

### **Murine A $\beta$ 1-40 and A $\beta$ 1-42 ELISA assay**

Sandwich enzyme-linked immunosorbent assay (ELISA) for murine A $\beta$  1-40 and A $\beta$  1-42 was performed as recommended by the manufacturer (kits KMB3481 and KMB3441, Thermo Fisher Scientific, Schwerte, Germany). N2a cells overexpressing hPS1 and mock transfected cells were harvested and lysed with lysis buffer (50mM Tris-HCl, 150mM NaCl, 1mM EDTA, 10% glycerol, 1% NP-40 and sodium azide). Protein concentration was determined with the BCA method, and equal amounts of protein were used for A $\beta$  peptides concentration assessment. Protein lysates were collected and probed with the ELISA kit for each antigen. Samples were measured at 450 nm in a Bio-tek mQuant spectrophotometer (Winooski, VT, USA) and expressed as ng/mg of total protein.

### **Murine PS1 knock down in N2a cells**

Murine Neuroblastoma N2a cells were transfected using Lipofectamine RNAiMAX reagent (Thermo Fisher Scientific, Schwerte, Germany) following the manufacturer's instructions. To Knock down PS1, cells were transfected with 20uM PS1 siRNA MSS208051 together with RNAiMAX diluted in OPTIMEM medium and added to DMEM + FBS medium for 48 hours. For negative control, cells were similarly transfected using 8nM Stealth siRNA negative control. Both, PS1 and negative control siRNA were acquired from Thermo Fisher Scientific, Schwerte, Germany. Transfection efficiency of PS1 siRNA was evaluated by western blot after each experiment. Out of 36 transfections we observe mean PS1 levels = 13.52 %, max = 27.84 %, min = 0.51 %, standard deviation = 7.16 % (Fig. S3A-B).

1. Greenough, M.A. *et al.* Presenilins promote the cellular uptake of copper and zinc and maintain copper chaperone of SOD1-dependent copper/zinc superoxide dismutase activity. *J. Biol. Chem.* **286**, 9776-86 (2011).

**Table 1**

| Author   | Journal             | Year | Model                                                                | Result                                                                                |
|----------|---------------------|------|----------------------------------------------------------------------|---------------------------------------------------------------------------------------|
| Niwa     | Cell                | 1999 | COS1/Hela cells                                                      | Impaired translocation of IRE1 by PS1 Kn in activated UPR                             |
| Katayama | NatCell Biol.       | 1999 | SK-N-SH neuroblastoma cells                                          | PS1 mutations decrease BiP                                                            |
| Sato     | NatCell Biol.       | 2000 | Primary cultured fibroblasts from Ps1 mutant mice /N2a cells         | No effect                                                                             |
| Imaizumi | NatCell Biol.       | 2001 | SK-N-SH neuroblastoma cells                                          | Inhibited IRE1 and PERK in PS1 mutants                                                |
| Imaizumi | BiochemBiophys Acta | 2001 | -----                                                                | Inhibited IRE1 and BiP in PS1 mutants (review)                                        |
| Katayama | JBC                 | 2001 | SK-N-SH neuroblastoma/MEFs cells                                     | PS1 mutants inhibit Ire and ATF6                                                      |
| Sato     | JBC                 | 2001 | SK-N-SH neuroblastoma/N2a cells                                      | impaired UPR (BiP)                                                                    |
| Siman    | JBC                 | 2001 | Primary cultured cortical neurons                                    | No effect after 16h of treatment                                                      |
| Steiner  | NeurobiolDis        | 2001 | HEK293 cells                                                         | ATF6 not affected by PS1                                                              |
| Chan     | NeurobiolDis        | 2002 | PC12 cells / Primary cultured hippocampal neurons                    | PS1 mutants increased caspase 12 and calpain levels                                   |
| Milhavet | J Neurochem         | 2002 | PC12 cells/ Knock-in mice                                            | Increased CHOP and eif2 $\alpha$                                                      |
| Terro    | J Neurosci Res      | 2002 | Primary cultured cortical neurons                                    | PS1 mutants are more sensitive to ER stress death                                     |
| Yasuda   | BBRC                | 2002 | N2a cells/primary cultured fibroblasts from mutant knock-in PS1 mice | PS1 mutants inhibit PERK                                                              |
| Katayama | J ChemNeuroanat     | 2004 | -----                                                                | Review of previous                                                                    |
| Piccini  | NeurobiolDis        | 2004 | Primary cultured fibroblasts from FAD patients                       | No effect                                                                             |
| Hoozeman | Acta Neuropathol    | 2005 | Post-mortem brain tissue                                             | Increased BiP and p-Perk                                                              |
| Yukioka  | NeurochemInt        | 2008 | SK-N-SH Neuroblastoma/COS7 cells                                     | Increased Caspase 4 activation                                                        |
| Jin      | JAD                 | 2010 | HEK293/GOTO/KNS-42 cells                                             | Tunicamycin increases PS1 and BiP levels. PS1 protects through interaction with SERCA |
| Szaraz P | ArchBiochemBiophys  | 2013 | HepG2                                                                | PS1 silencing increased BiP, PDI, CHOP, ATF6. Also lead to autophagosome formation.   |
| Shao Y   | Int J ClinExp Med   | 2015 | SH-SY5Y                                                              | PS1 mutant decreased BiP levels                                                       |

Color code: Blue shade = decreased response, Pink shade = increased response, Green shade = no changes.

Table 2

| Protein            | Line comparison             | p Value            | Protein              | Line comparison             | p Value       |
|--------------------|-----------------------------|--------------------|----------------------|-----------------------------|---------------|
| <b>GADD34</b>      | hPS1WT vs. Mock             | 0.6269             | <b>MTCH1</b>         | <i>hPS1WT vs. Mock</i>      | <i>0.0105</i> |
|                    | hPS1E280A vs. Mock          | 0.5385             |                      | hPS1E280A vs. Mock          | 0.0968        |
|                    | hPS1D9 vs. Mock             | 0.6336             |                      | hPS1D9 vs. Mock             | 0.0684        |
|                    | hPS1E280A vs. hPS1WT        | 0.9812             |                      | hPS1E280A vs. hPS1WT        | 0.6873        |
|                    | hPS1D9 vs. hPS1WT           | 0.9812             |                      | hPS1D9 vs. hPS1WT           | 0.6950        |
|                    | hPS1D9 vs. hPS1E280A        | 0.9812             |                      | hPS1D9 vs. hPS1E280A        | 0.8139        |
| <b>BiP</b>         | hPS1WT vs. Mock             | 0.9080             | <b>Cyclophilin D</b> | hPS1WT vs. Mock             | 0.8095        |
|                    | hPS1E280A vs. Mock          | 0.9080             |                      | <i>hPS1E280A vs. Mock</i>   | <i>0.0002</i> |
|                    | hPS1D9 vs. Mock             | 0.8555             |                      | <i>hPS1D9 vs. Mock</i>      | <i>0.0064</i> |
|                    | hPS1E280A vs. hPS1WT        | 0.9829             |                      | <i>hPS1E280A vs. hPS1WT</i> | <i>0.0003</i> |
|                    | hPS1D9 vs. hPS1WT           | 0.9829             |                      | <i>hPS1D9 vs. hPS1WT</i>    | <i>0.0096</i> |
|                    | hPS1D9 vs. hPS1E280A        | 0.9829             |                      | hPS1D9 vs. hPS1E280A        | 0.3154        |
| <b>CHOP</b>        | hPS1WT vs. Mock             | 0.5130             | <b>Synthase C</b>    | hPS1WT vs. Mock             | 0.1632        |
|                    | hPS1E280A vs. Mock          | 0.4236             |                      | hPS1E280A vs. Mock          | 0.0785        |
|                    | hPS1D9 vs. Mock             | 0.7982             |                      | <i>hPS1D9 vs. Mock</i>      | <i>0.0004</i> |
|                    | hPS1E280A vs. hPS1WT        | 0.8354             |                      | hPS1E280A vs. hPS1WT        | 0.5754        |
|                    | hPS1D9 vs. hPS1WT           | 0.8354             |                      | hPS1D9 vs. hPS1WT           | 0.0751        |
|                    | hPS1D9 vs. hPS1E280A        | 0.8354             |                      | hPS1D9 vs. hPS1E280A        | 0.1631        |
| <b>LC3B-I</b>      | hPS1WT vs. Mock             | 0.3879             |                      |                             |               |
|                    | hPS1E280A vs. Mock          | 0.6336             |                      |                             |               |
|                    | hPS1D9 vs. Mock             | 0.3196             |                      |                             |               |
|                    | hPS1E280A vs. hPS1WT        | 0.8784             |                      |                             |               |
|                    | hPS1D9 vs. hPS1WT           | 0.8784             |                      |                             |               |
|                    | hPS1D9 vs. hPS1E280A        | 0.8784             |                      |                             |               |
| <b>LC3B-II</b>     | hPS1WT vs. Mock             | 0.2075             |                      |                             |               |
|                    | <i>hPS1E280A vs. Mock</i>   | <i>&lt; 0.0001</i> |                      |                             |               |
|                    | hPS1D9 vs. Mock             | 0.4852             |                      |                             |               |
|                    | <i>hPS1E280A vs. hPS1WT</i> | <i>&lt; 0.0001</i> |                      |                             |               |
|                    | hPS1D9 vs. hPS1WT           | 0.7203             |                      |                             |               |
|                    | <i>hPS1D9 vs. hPS1E280A</i> | <i>&lt; 0.0001</i> |                      |                             |               |
| <b>LC3B II / I</b> | hPS1WT vs. Mock             | 0.9313             |                      |                             |               |
|                    | <i>hPS1E280A vs. Mock</i>   | <i>&lt; 0.0001</i> |                      |                             |               |
|                    | hPS1D9 vs. Mock             | 0.9356             |                      |                             |               |
|                    | <i>hPS1E280A vs. hPS1WT</i> | <i>&lt; 0.0001</i> |                      |                             |               |
|                    | hPS1D9 vs. hPS1WT           | 0.9356             |                      |                             |               |
|                    | <i>hPS1D9 vs. hPS1E280A</i> | <i>&lt; 0.0001</i> |                      |                             |               |

**Table 3**

| Reagents                       |                   |                                                                                                                                                                                                                                     |
|--------------------------------|-------------------|-------------------------------------------------------------------------------------------------------------------------------------------------------------------------------------------------------------------------------------|
| Name                           | Company           | Mode of action                                                                                                                                                                                                                      |
| Tunicamycin                    | Sigma-Aldrich     | Induces ER stress by blocking the formation of N-glycosidic linkages, causes G1 arrest                                                                                                                                              |
| Calcimycin                     | Sigma-Aldrich     | Calcium ionophore, uncoupler of oxidative phosphorylation and inhibitor of mitochondrial ATPase activity                                                                                                                            |
| Antimycin A                    | Sigma-Aldrich     | Inhibitor of electron transfer at complex III. Induces apoptosis                                                                                                                                                                    |
| DMSO                           | Sigma-Aldrich     |                                                                                                                                                                                                                                     |
| Synthetic human A $\beta$ 1-42 | GenicBio          | Aggregation and oligomerization leading to toxicity                                                                                                                                                                                 |
| DAPT                           | Sigma-Aldrich     | Inhibitor of $\gamma$ -secretase, blocks Notch signaling                                                                                                                                                                            |
| 2-APB                          | Sigma-Aldrich     | IP <sub>3</sub> receptor antagonist. TRP channel modulator, stimulates store-operated calcium (SOC) release at low concentrations (< 10 $\mu$ M) and inhibits it at higher concentrations (>50 $\mu$ M), Modulator of TRP channels. |
| Bradykinin                     | Sigma-Aldrich     | Bradykinin receptor agonist: stimulates intracellular calcium activity, GPCR activation, IP3-dependent Ca <sup>2+</sup> ER release                                                                                                  |
| Calcein acetoxymethyl ester    | Sigma-Aldrich     | Cell-permeable dye, fluorescence of calcein is quenched by Co <sup>2+</sup> in the cytosol but not in mitochondria                                                                                                                  |
| Cyclosporin A                  | Sigma-Aldrich     | Calcineurin inhibitor                                                                                                                                                                                                               |
| Ionomycin                      | Sigma-Aldrich     | Calcium ionophore                                                                                                                                                                                                                   |
| FCCP                           | Sigma-Aldrich     | Oxidative phosphorylation uncoupler                                                                                                                                                                                                 |
| Compound W                     | Tocris Bioscience | Inhibitor of $\gamma$ -secretase; causes a decrease in the released levels of A $\beta$ 42 and notch-1 A $\beta$ -like peptide 25 (N $\beta$ 25).                                                                                   |

**Table 4**

| <b>Antibodies</b>   |                                  |                     |               |
|---------------------|----------------------------------|---------------------|---------------|
| <b>Name</b>         | <b>Company and serial number</b> | <b>Weight (kDa)</b> | <b>Source</b> |
| BiP                 | BD-610979                        | 78                  | Mouse         |
| Caspase3c           | Cell signaling 9661              | 17-19               | Rabbit        |
| CHOP                | Cell signaling 2895              | 27                  | Mouse         |
| Cyclophilin D       | Millipore AP-1035                | 17                  | Mouse         |
| GADD 34             | ProteinTech 10449-1-AP           | 100                 | Rabbit        |
| LC3B                | Cell signaling 2275              | 14-16               | Rabbit        |
| MTCH1               | LSBio C409602                    | 32                  | Rabbit        |
| PDI                 | Biovision 5601                   | 57                  | Rabbit        |
| PINK1               | Abcam 23707                      | 50-60               | Rabbit        |
| RIPK1               | BD-610458                        | 32-74               | Mouse         |
| pRIPK3              | Abcam 195117                     | 55                  | Mouse         |
| Synthase C          | Abcam 181243                     | 8-14                | Rabbit        |
| Lamp1               | SantaCruz sc-20011               | 120                 | Rabbit        |
| PS1                 | Cell signaling 3622              | 55-22               | Rabbit        |
| PS1 N-terminal      | Millipore 1563                   | 55-35               | Rat           |
| PS1                 | Abcam 15456                      | 28                  | Mouse         |
| APP CT-20 (CTL, FL) | Millipore 171610                 | 110                 | Rabbit        |
| GAPDH               | Millipore MAB374                 | 36                  | Mouse         |
| KDEL                | PA1-013 Thermo Scientific        | 57-78-94            | Rabbit        |
| Tom20               | SantaCruz sc-11415               | 20                  | Rabbit        |
| GM130               | Abcam 52649                      | 112                 | Rabbit        |
| Lamp1               | 14-107182 Thermo Scientific      | 120                 | Rat           |

**Figure S1**

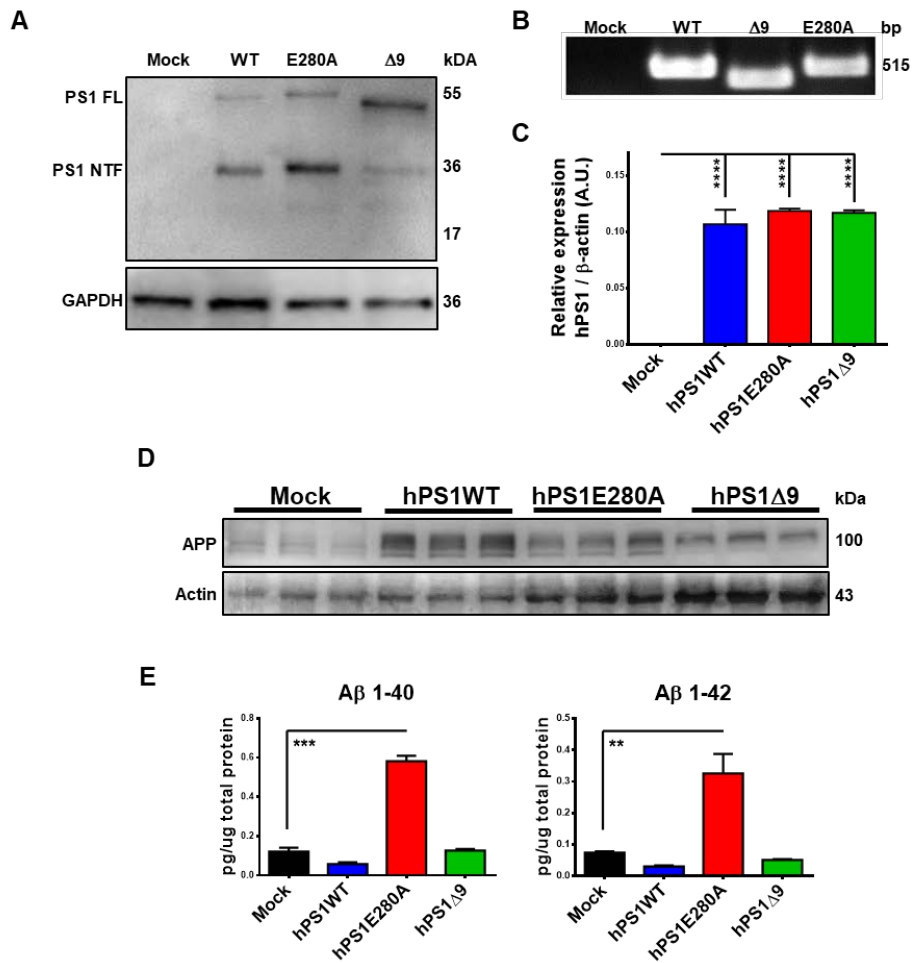

**Figure S1.** (A) Western blot for PS1 levels in stably transfected N2A cells assessed using a human PS1 specific antibody (Millipore MAB1563). Specific expression of human PS1 is visible in all stably transfected cell lines. (B) Agarose gel electrophoresis for PCR products using human PS1 primers in stably transfected N2A cells. (C) Human PS1 expression in stably transfected N2A cells tested by qPCR. (D) Western blot for APP levels in mock and stably transfected N2A cells. (E) ELISA assays for Murine A $\beta$  1-40 and 1-42 in stably transfected N2a cells. Only hPS1E280A cells show significantly increased levels when compared to mock cells. \*\*P < 0.01, \*\*\*P < 0.001. Data are mean  $\pm$  SEM, One-Way ANOVA.

**Figure S2**

**A**

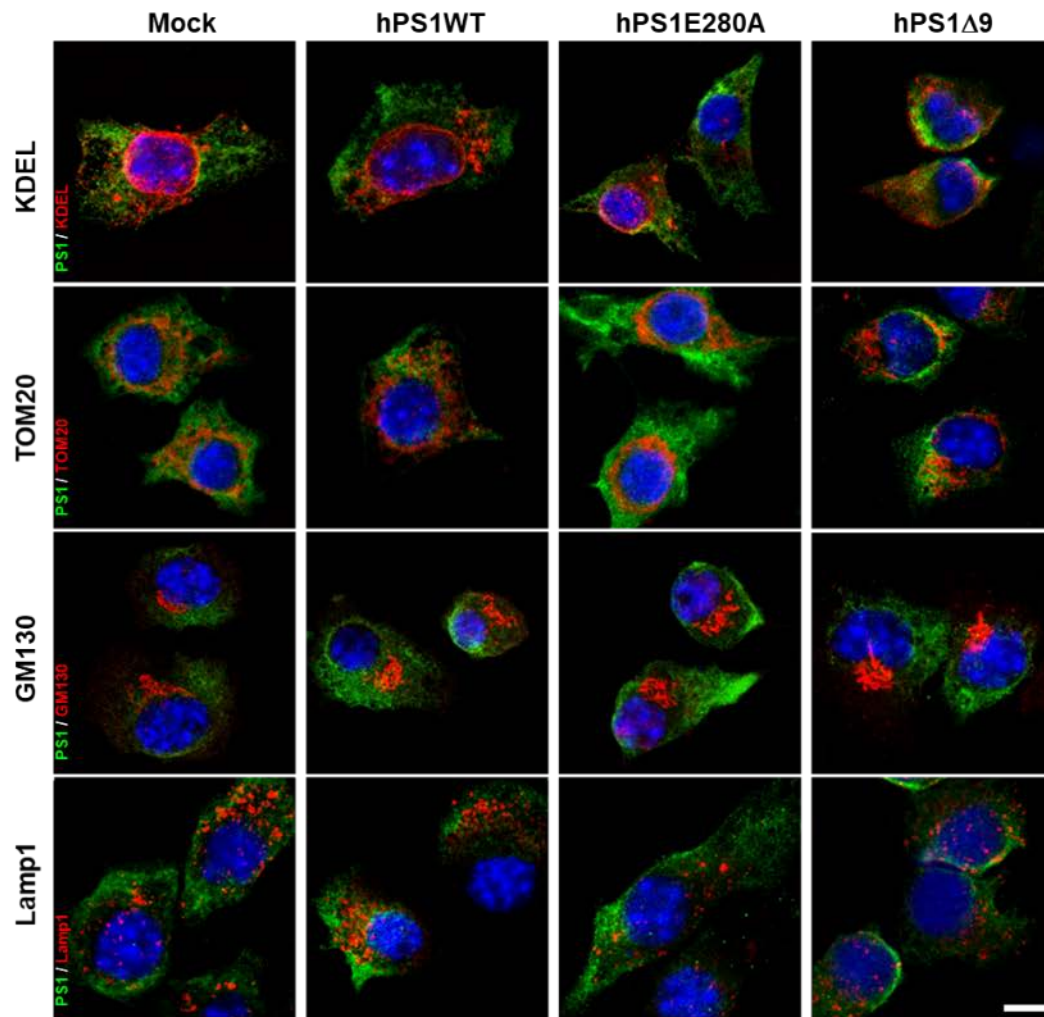

**B**

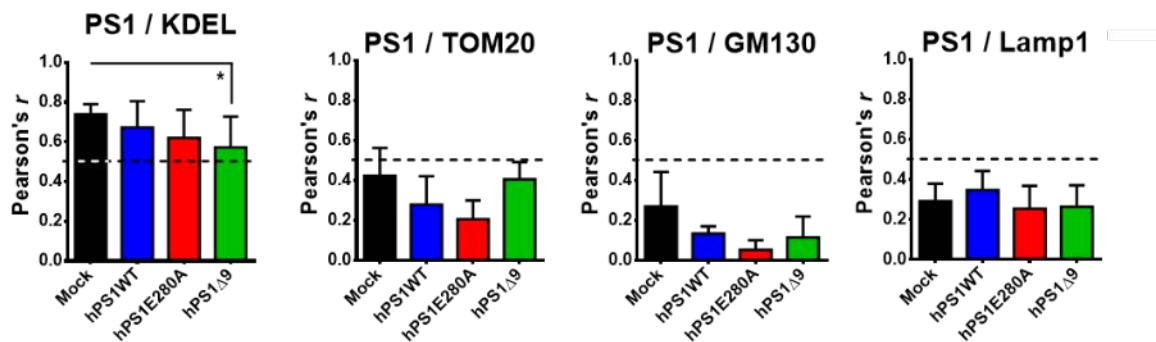

**Figure S2.** (A) Representative confocal microscopy pictures of Mock, hPS1WT, hPS1E280A and hPS1Δ9 N2a cells assessing PS1 (red) colocalization with markers (in green) for ER (KDEL), mitochondria (Tom20), Golgi (GM130) and lysosomes (Lamp1). (B) Signal was quantified in 3 independent experiments in at least P8 cells per experiment and cell line. Pearson's coefficients showed significant differences for PS1-KDEL colocalization between mock and hPS1Δ9 N2a cells. Dotted lines represent colocalization thresholds. \* $P < 0.05$ . Data are mean  $\pm$  SEM, Two-Way ANOVA. Bar=7  $\mu$ m

**Figure S3**

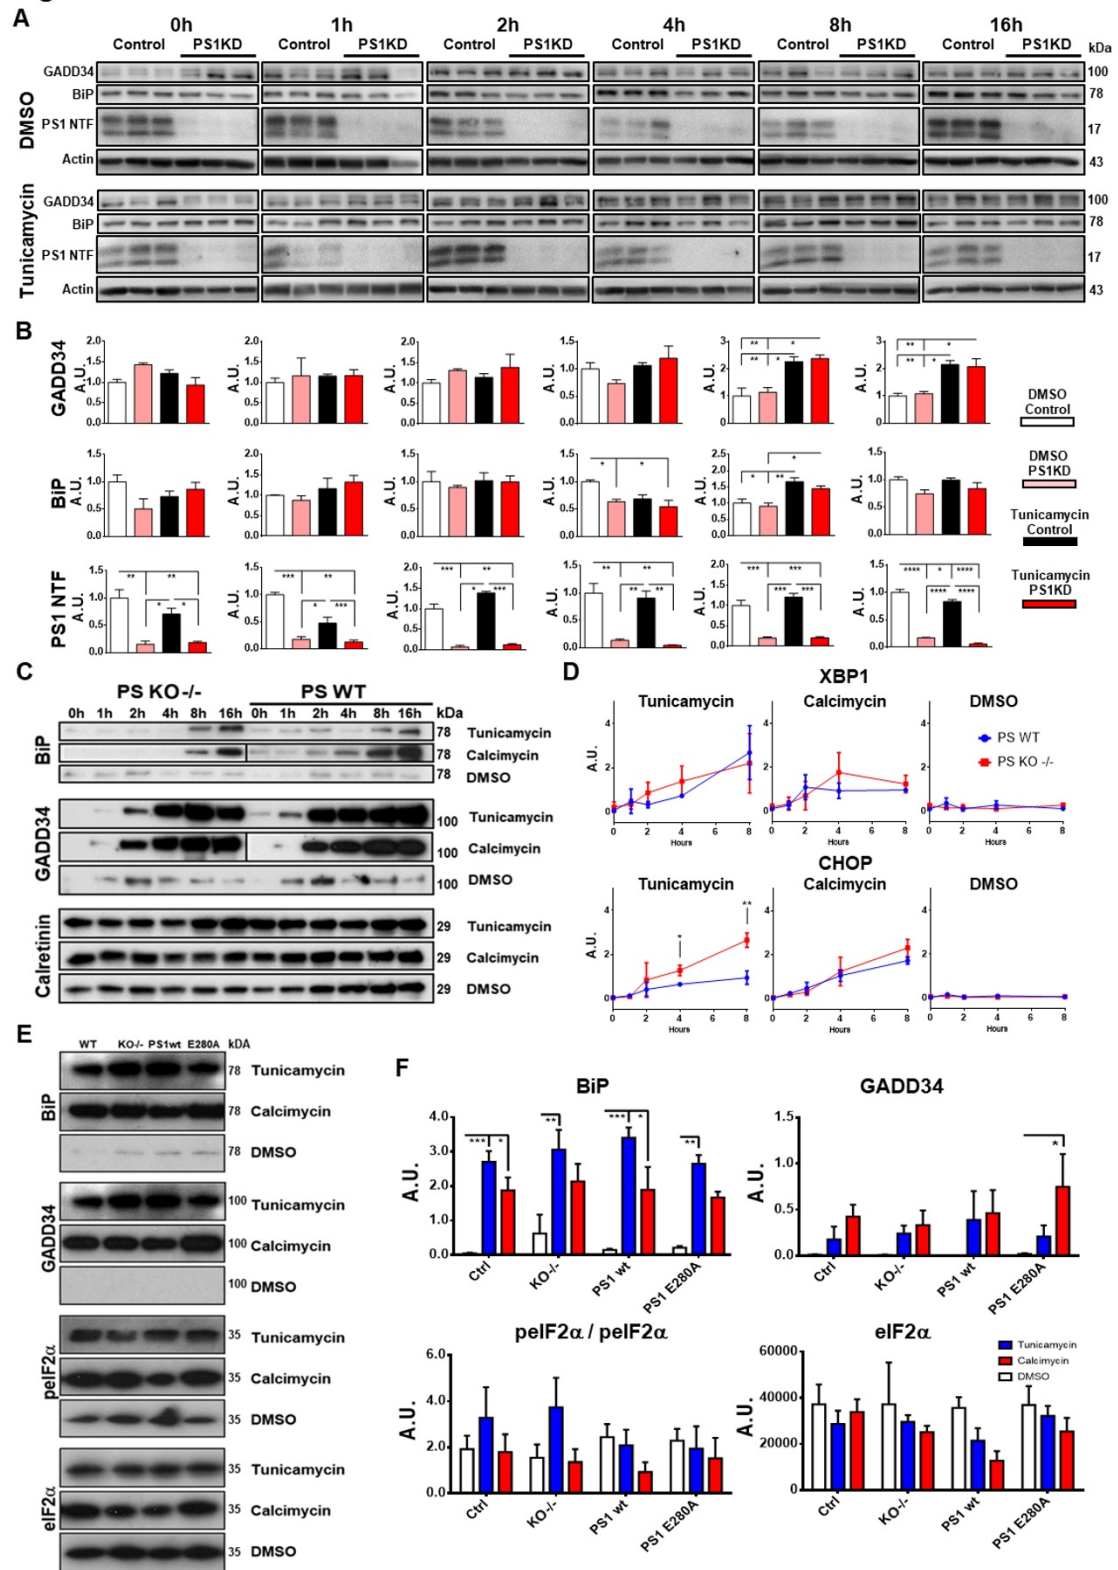

**Figure S3.** (A) PS1 expression in N2a cells was knocked down using specific murine PSEN1 siRNA (PS1KD). PS1KD cells and their controls were treated with Tunicamycin to induce ER stress at different time points using BiP, Gadd34 as markers and actin as loading control. (B) Densitometric analysis of BiP, Gadd34 and PS1 shows increased levels of GADD34 and BiP at 8 h, and of GADD34 at 16 h in treated cells, independently on PS1 levels. \* $P < 0.05$ , \*\* $P < 0.01$ , \*\*\* $P < 0.001$ , \*\*\*\* $P < 0.0001$ . Data are mean  $\pm$  SEM, Two-Way ANOVA. (C) PS1/PS2 knockout MEF cells (PS KO<sup>-/-</sup>) and expressing PS1 WT were also treated with Tunicamycin and Calcimycin to induce ER stress at different time points using BiP, GADD34 as markers and calretinin as loading control. Samples in the Calcimycin blots for BiP and GADD34 were loaded following a different order. For this panel there were cropped and reordered following the general loading order. (D) Expression of UPR markers CHOP and XBP1 was evaluated with qPCR. (E) ER stress induction assessment with BiP, GADD34, pelf2 $\alpha$  and eIF2 $\alpha$  levels, after 8 h of Tunicamycin or Calcimycin treatments in PS1 stably rescued MEFS. (F) Densitometric analysis of BiP, GADD34, pelf2 $\alpha$  and eIF2 $\alpha$ . Tunicamycin increased BiP levels in all cell lines. There were no differences between PS KO<sup>-/-</sup> and PS1 rescued cells. \* $P < 0.05$ , \*\* $P < 0.01$ , \*\*\* $P < 0.001$ . Data are mean  $\pm$  SEM, Two-Way ANOVA.

**Figure S4**

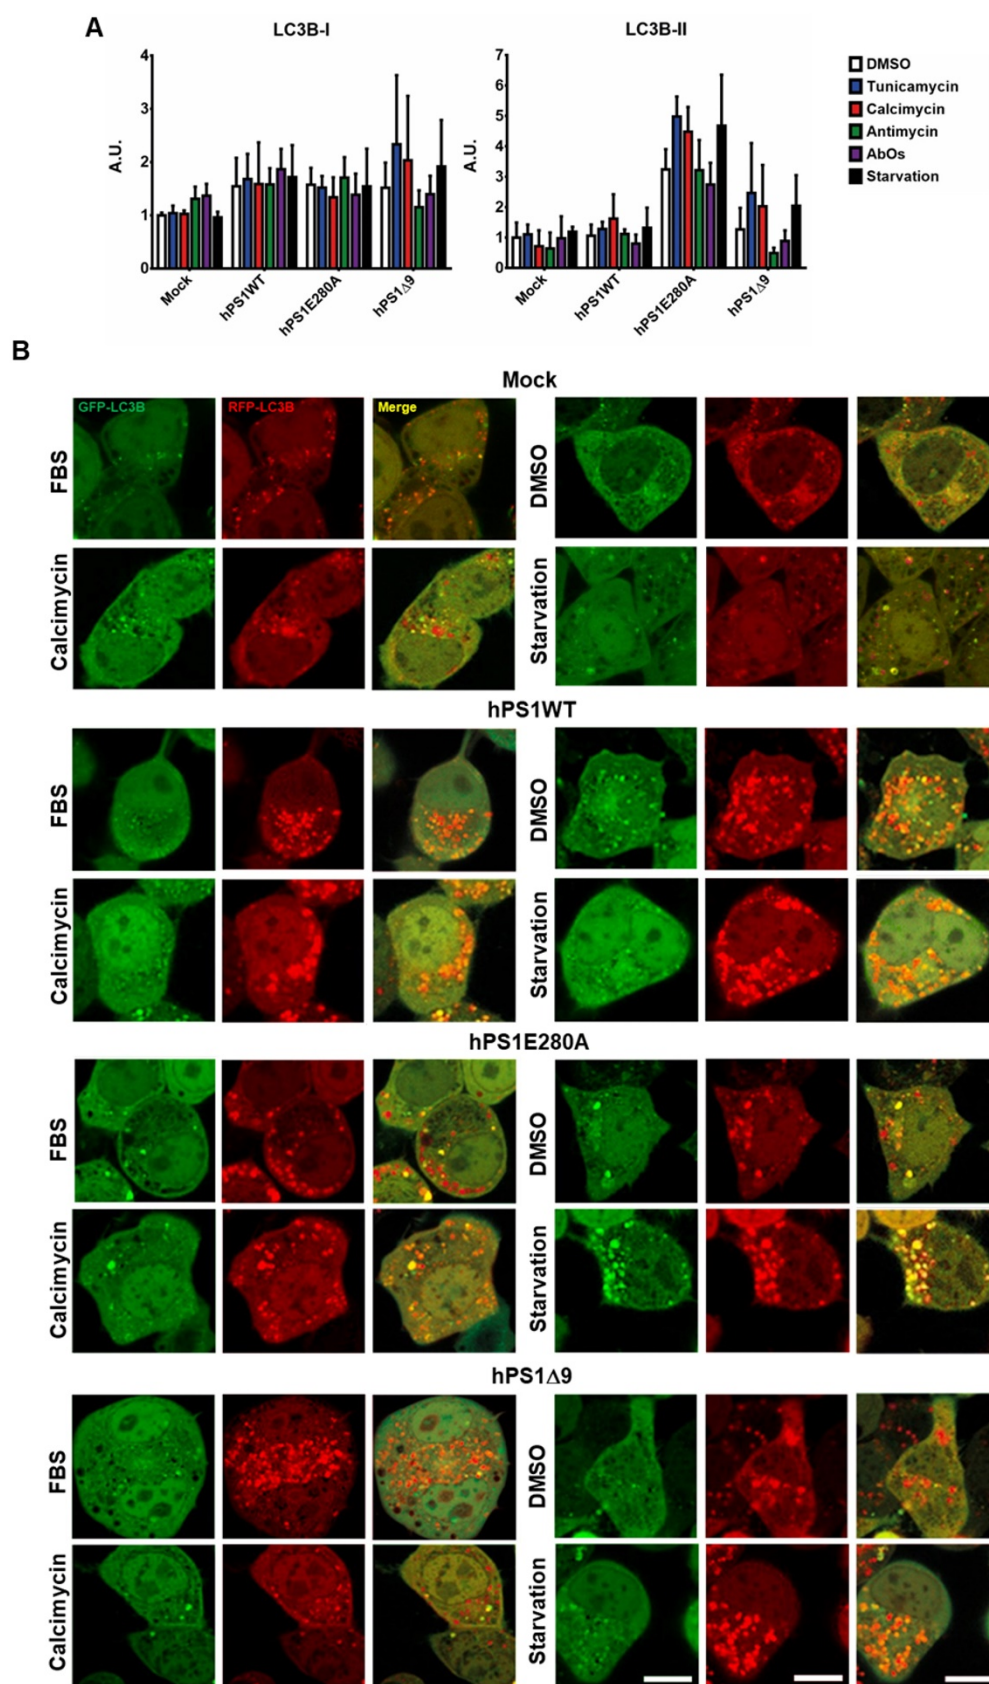

**Figure S4.** (A) LC3B I and LC3B II densitometric quantification normalized to PDI and compared to basal conditions. (B) Green (GFP-LC3B) channel, red (RFP- LC3B) channel and merged images observed in panel 2C. Transfected cells were treated with vehicle (DMSO) and stressors (Calcimycin and Starvation). The transition from autophagosomes (yellow) to autolysosomes (red) can be visualized by the specific loss of GFP fluorescence upon acidification of the autophagosome following lysosomal fusion. Bar = 7 $\mu$ m.

**Figure S5**

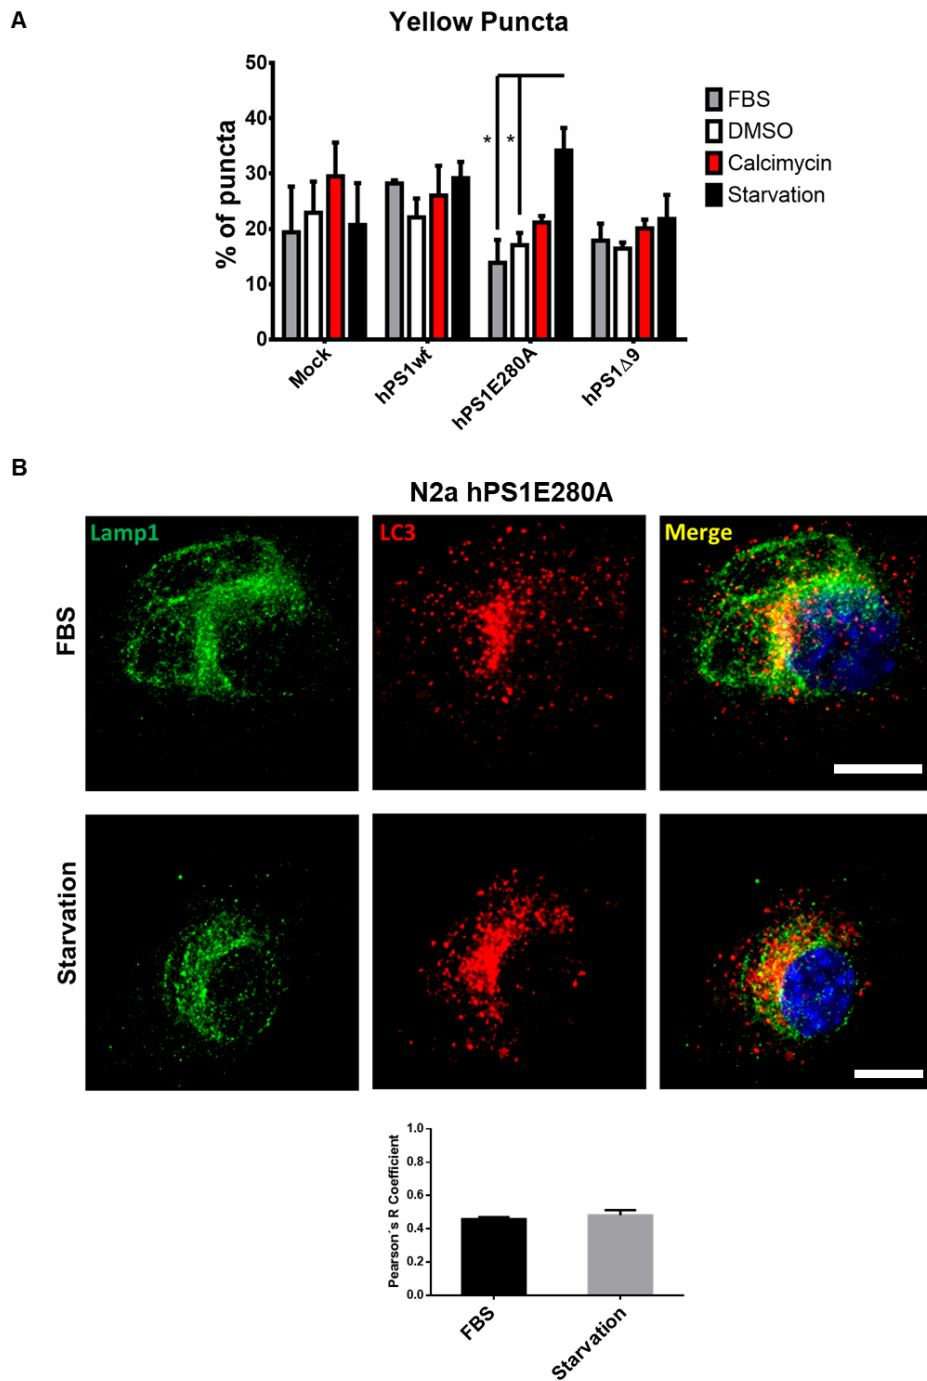

**Figure S5.** (A). Yellow puncta quantification in N2a cells transfected with the RFP-GFP-LC3B construct. Transfected cells were treated with vehicle (DMSO) and stressors (Calcimycin and Starvation) for 16 h. (B). Representative confocal microscopy pictures of PS1E280A N2A starved for 16 h and their FBS controls. Localization and signal of LC3B (red) and Lamp1 (green) was quantified in 3 independent experiments. Pearson's coefficients showed no significant differences between starved and non-starved cells. Bar= 7 $\mu$ m \*P < 0.05, \*\*P < 0.01, \*\*\*P < 0.001. Data are mean  $\pm$  SEM, Two-Way ANOVA for A and T-test for B.

**Figure S6**

**A**

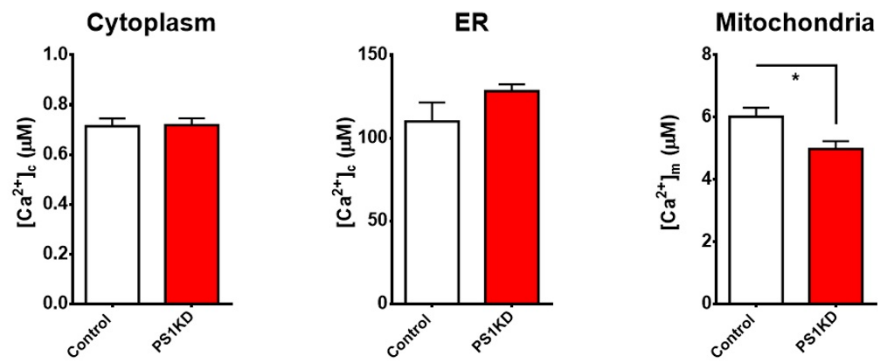

**B**

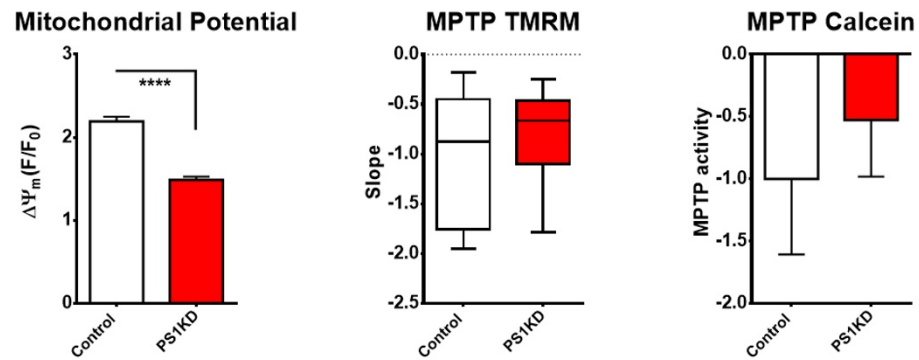

**Figure S6.** N2a PS1KD were used to measure intracellular calcium ( $Ca^{2+}$ ) concentrations in basal conditions using transient transfection of a compartment-specific aequorin constructs. (A) Bar graphs of the maximum cytosolic, ER and mitochondria calcium in PS1KD and control cells. Only mitochondria calcium showed decreased levels in PS1KD cells. (B) Bar graphs representing TMRM intensity as measurement of mitochondrial membrane potential ( $\Delta\Psi_m$ ) and MPTP activity during live imaging. Only  $\Delta\Psi_m$  showed significantly decreased levels in PS1KD cells, while both approaches for MPTP measurement showed no differences. Mean and  $\pm$ SEM are presented for all experiments, Two Way ANOVA, \* $p < 0.05$ , \*\*\*\* $p < 0.0001$   $n > 30$  measurements.

**Figure S7**

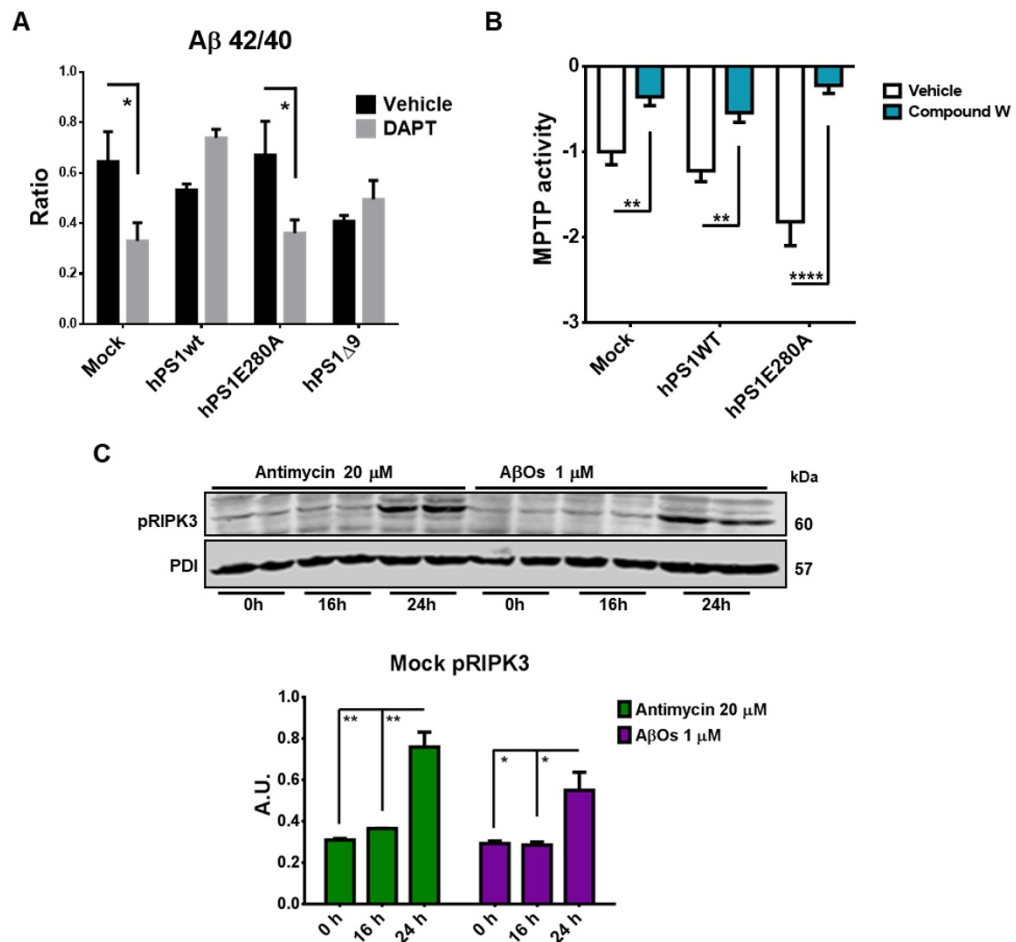

**Figure S7.** (A) Aβ 1-42/1-40 ratio calculated from peptide levels in mock, hPS1WT and hPS1E280A N2a cells using ELISA assays after 16 h of treatment with 250  $\mu$ M of DAPT. DAPT treatment significantly decreased ratios in mock and hPS1E280A cells. \*P < 0.05, data are mean  $\pm$  SEM, Two-Way ANOVA. (B) MPTP activity in mock, hPS1WT and hPS1E280A N2a cells after 48h of treatment with 10 mM of Compound W, a  $\gamma$ -secretase inhibitor. Compound W significantly decreased MPTP activity in all cell lines. \*\*P < 0.01, \*\*\*\*P < 0.0001, data are mean  $\pm$  SEM, Two-Way ANOVA. (C) Representative western blot and densitometric analysis for pRIPK3 and PDI as loading control of control N2a cells treated with antimycin 20 mM and 1-42 Ab oligomers 1 mM at 0, 16 and 24 h. pRIPK3 levels are significantly higher for both treatments after 24 h. \*P < 0.05, \*\*P < 0.01, data are mean  $\pm$  SEM, Two-Way ANOVA.
